# Supplementary material
Source: Springer Nature journal article supplement (https://www.springermedizin.de/resource/supplementary/13054_2009_8591_MOESM6_ESM.pdf/9732324)

← Steroids harmful Steroids beneficial →

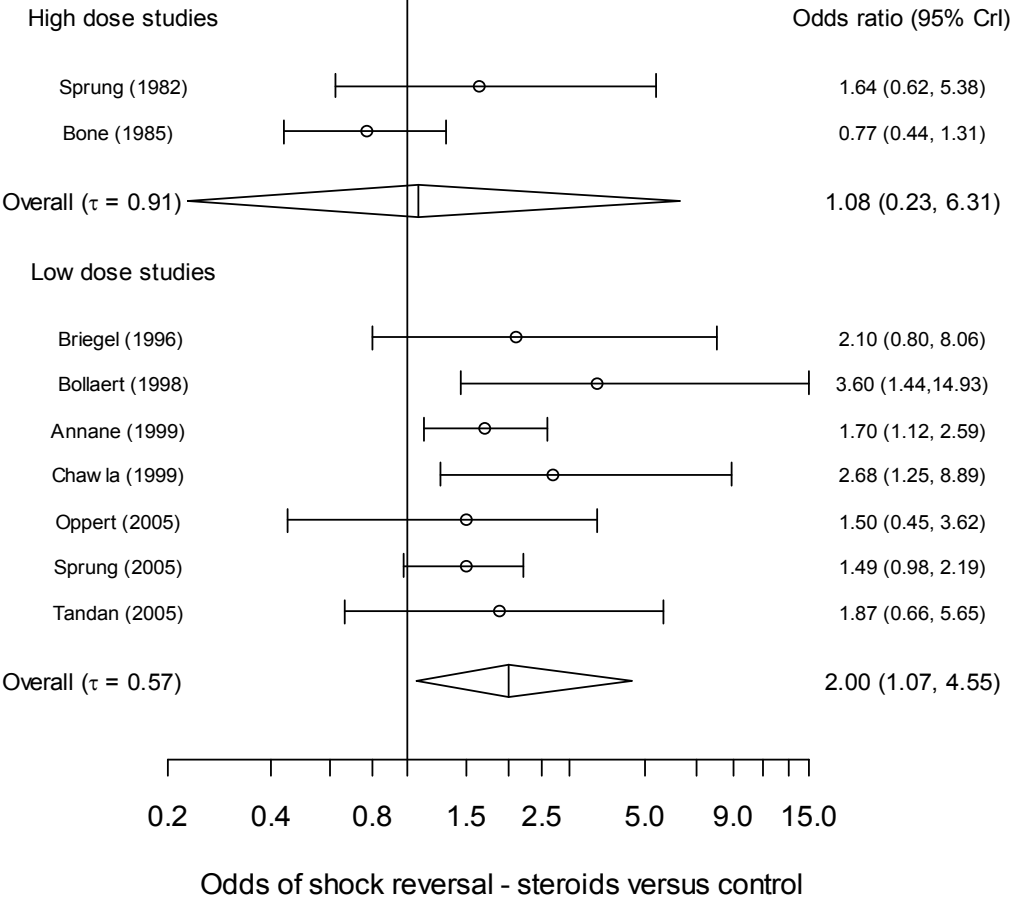

Supplement: MOESM6 [file 9732324]
